# Supplementary material
Source: ML conference proceedings conference paper supplement (https://openreview.net/forum?id=83A-0x6Pfi_)
Supplement: supplementary_material [file attachment]

Supplementary Materials - *Source Code* for  
NeurIPS 2021 Submission, Paper #8392  
Adversarial Robustness of Streaming Algorithms through  
Importance Sampling

## 1 Streaming $k$ -means

```
from sklearn.datasets import make_blobs
import numpy as np
from clusopt_core.cluster import Streamkm
from pyspark.ml.linalg import Vectors
from pyspark import SparkContext
from pyspark.streaming import StreamingContext
from pyspark.sql import *
from pyspark.sql import SQLContext
from pyspark.mllib.clustering import StreamingKMeans

# Create Dataset : regular batches around [-1,1] x [-1, 1]
#   and last batch around [9,10] x [9, 10]
NUM_REGULAR_BATCHES = 9
NUM_BATCHES = NUM_REGULAR_BATCHES + 1
NUM_REGULAR_BATCH_SAMPLES = 30
NUM_LAST_BATCH_SAMPLES = 15
NUM_SAMPLES = NUM_REGULAR_BATCHES*NUM_REGULAR_BATCH_SAMPLES + NUM_LAST_BATCH_SAMPLES
CLUSTER_STD_DEV = 0.3

batches = []
data = np.ndarray([0,2])
for i in range(NUM_BATCHES):
    cb = [-1, 1] if i < NUM_REGULAR_BATCHES else [9, 10]
    ns = NUM_REGULAR_BATCH_SAMPLES if i < NUM_REGULAR_BATCHES else NUM_LAST_BATCH_SAMPLES
    dataset, _ = make_blobs(n_samples=ns, centers=1, center_box=cb, random_state=42, cluster_s
    batches.append(dataset)
    data = np.concatenate([data, dataset])
```

```

# StreamKM++
CORESET_SIZE = 6

modelkm = Streamkm(
    coresetsize=CORESET_SIZE,
    length=NUM_SAMPLES,
    seed=42,
)

for i in range(NUM_BATCHES):
    modelkm.partial_fit(batches[i])
    skm_centers, _ = modelkm.get_final_clusters(2, seed=42)
    skm_coresets = modelkm.get_partial_cluster_centers()

# Spark Streaming KMeans
try:
    sc = SparkContext("local[*]", "RobuStreaming")
    ssc = StreamingContext(sc, 0.1)
    sqlCtx = SQLContext(sc)
    print("spark context initialized")
except:
    print("stopping spark context")
    ssc.stop()

trainingData = []
trainingQueue = []
for i in range(NUM_BATCHES):
    bdata = [Vectors.dense(s) for s in batches[i]]
    trainingData.append(bdata)
    dataf = sqlCtx.createDataFrame([(d,) for d in bdata], ["features"])
    trainingQueue.append(dataf.rdd.map(tuple))

eps = 0.1
trainingStream = ssc.queueStream(trainingQueue)
spark_model = StreamingKMeans(k=2, decayFactor=1.0).
    setInitialCenters([[0,0],[eps, eps]], [1.0, 1.0])
spark_model.trainOn(trainingStream)
ssc.start()
ssc.awaitTerminationOrTimeout(3)
spark_centers = spark_model.latestModel().centers
ssc.stop()

```

## 2 Streaming linear regression

```
from sklearn.datasets import make_blobs
import numpy as np
import pandas as pd
import random
import math
from sklearn.linear_model import LinearRegression
from river import evaluate
from river import linear_model
from river import metrics
from river import preprocessing

WITH_LAST_BATCH = True

NUM_REGULAR_BATCHES = 120
BATCH_SIZE_REGION = 5
BATCH_SIZE = BATCH_SIZE_REGION * 4
L = 6*np.ceil(np.sqrt(NUM_REGULAR_BATCHES))

if WITH_LAST_BATCH:
    NUM_BATCHES = NUM_REGULAR_BATCHES + 1
    NUM_REGULAR_SAMPLES = NUM_REGULAR_BATCHES * BATCH_SIZE_REGION * 4
    NUM_SAMPLES = NUM_REGULAR_SAMPLES + BATCH_SIZE
else:
    NUM_BATCHES = NUM_REGULAR_BATCHES
    NUM_REGULAR_SAMPLES = NUM_REGULAR_BATCHES * BATCH_SIZE_REGION * 4
    NUM_SAMPLES = NUM_REGULAR_SAMPLES

def create_dataset(n_reg_batches, region_batch_size, eps=0.3, l=1, s=0.01, r=L):
    # creates data samples as follows:
    #   a series of regular batches with points samples around a constellation of
    #     [-l+eps, l], [l-eps, -l], [-l, l-eps], [l, -l+eps], and a last batch
    #     around [l*r, l*r]. The stddev of sampling is s.
    # returns:
    #   batches - array of dataframes, batch_size long each
    #   dataset - array of ndarrays, each of shape [batch_size, 2]

    n_region_samples = n_reg_batches * region_batch_size
    cU = [[-l+eps-s, l-s], [-l+eps+s, l+s]]
    cD = [[l-eps-s, -l-s], [l-eps+s, -l+s]]
    cL = [[-l-s, l-eps-s], [-l+s, l-eps+s]]
    cR = [[l-s, -l+eps-s], [l+s, -l+eps+s]]
    cX = [[l*r-s, l*r-s], [l*r+s, l*r+s]]
    datasetU, _ = make_blobs(n_samples=n_region_samples, centers=1, center_box=cU,
```

```

        random_state=42, cluster_std=s)
datasetD, _ = make_blobs(n_samples=n_region_samples, centers=1, center_box=cD,
        random_state=42, cluster_std=s)
datasetL, _ = make_blobs(n_samples=n_region_samples, centers=1, center_box=cL,
        random_state=42, cluster_std=s)
datasetR, _ = make_blobs(n_samples=n_region_samples, centers=1, center_box=cR,
        random_state=42, cluster_std=s)
datasetX, _ = make_blobs(n_samples=region_batch_size * 4, centers=1,
        center_box=cX, random_state=42, cluster_std=s)

dataset = np.concatenate([datasetU, datasetD, datasetL, datasetR])
np.random.shuffle(dataset)
if WITH_LAST_BATCH:
    dataset = np.concatenate([dataset, datasetX])

batches = []
for i in range(n_reg_batches):
    batch = np.concatenate([datasetU[i*region_batch_size: (i+1)*region_batch_size, :],
        datasetD[i*region_batch_size: (i+1)*region_batch_size, :],
        datasetL[i*region_batch_size: (i+1)*region_batch_size, :],
        datasetR[i*region_batch_size: (i+1)*region_batch_size, :]])
    np.random.shuffle(batch)
    batches.append(pd.DataFrame(data=batch, columns=["X", "Y"]))

if WITH_LAST_BATCH:
    batches.append(pd.DataFrame(data=datasetX, columns=["X", "Y"]))
return batches, dataset

batches, all_dataset = create_dataset(NUM_REGULAR_BATCHES, BATCH_SIZE_REGION)
dataset = np.split(all_dataset, NUM_BATCHES)

class LeverageSampler:
    def __init__(self, scale=10):
        self.first = True
        self.scale = scale

    def Sample(self, batch):
        added = 0
        for b in batch:
            recompute_iv = False

            if self.first:
                self.first = False
                self.M = b
                added += 1
                self.M = np.expand_dims(self.M, axis=0)

```

```

        recompute_iv = True
    else:
        score = np.matmul(b, np.matmul(self.MTM_IV, b.T))
        assert(score > 0)
        probAdd = min(1.0, score*self.scale)
        randomNum = random.uniform(0,1)
        if randomNum <= probAdd:
            added +=1
            self.M = np.vstack([self.M, b/math.sqrt(probAdd)])
            recompute_iv = True
    if recompute_iv:
        self.MTM_IV = np.linalg.pinv(np.matmul(self.M.T, self.M))
    return added

def Reg(self):
    A = self.M[:, :-1]
    b = self.M[:, -1:]
    return LinearRegression().fit(A, b)

def MeanSquaredError(self, dbatches, n):
    reg = self.Reg()
    loss = 0
    for i, batch in enumerate(dbatches):
        if i <= n:
            features = batch[:, 0]
            actual = batch[:, 1]
            preds = reg.predict(batch[:, :-1])
            for i in range(len(preds)):
                loss += (preds[i] - actual[i])**2
    return loss/((n+1)*BATCH_SIZE)

# Leveraged Sampler - Train and Loss:
smp = LeverageSampler()
loss_arr = []

for i, batch in enumerate(dataset):
    added = smp.Sample(batch)
    loss = smp.MeanSquaredError(dataset, i)
    loss_arr.append(loss)
    reg = smp.Reg()
    a_smp = reg.coef_
    b_smp = reg.intercept_

# River Stream - Train and Loss:
def RiverMeanSquaredError(model, dbatches, n):

```

```

# Compute loss over dataset first n batches

a = model['LinearRegression'].weights['X']
b = model['LinearRegression'].intercept
loss = 0
for i, batch in enumerate(dbatches):
    if i <= n:
        features = batch[:,0]
        actual = batch[:,1]
        preds = a*features + b
        for i in range(len(preds)):
            loss += (preds[i] - actual[i])**2
return loss/((n+1)*BATCH_SIZE)

model = (
    preprocessing.StandardScaler() |
    linear_model.LinearRegression(intercept_lr=.12)
)

river_loss_arr = []
if WITH_LAST_BATCH:
    total_batches = NUM_REGULAR_BATCHES + 1
else:
    total_batches = NUM_REGULAR_BATCHES

for i in range(total_batches):
    batch = batches[i]
    model.learn_many(pd.DataFrame(batch, columns=["X"]), batch["Y"].squeeze())
    loss = RiverMeanSquaredError(model, dataset, i)
    river_loss_arr.append(loss)

a_river = model['LinearRegression'].weights['X']
b_river = model['LinearRegression'].intercept

```

### 3 Sampling vs. Sketching

```
import numpy as np
import random
import math
from scipy.linalg import null_space
from sklearn.linear_model import LinearRegression

NUMERICAL_SCALING = 1000

# Sketching.

class Sketch:
    def __init__(self, numRows, numCols):
        self.S = []
        for r in range(numRows):
            dummyRow = []
            for c in range(numCols):
                dummyRow.append(0)
            self.S.append(dummyRow)
        for r in range(numRows):
            for c in range(numCols):
                randomReal = random.uniform(0,1)
                if randomReal < 0.5:
                    self.S[r][c] = -1
                else:
                    self.S[r][c] = 1
        self.S = np.array(self.S)

    def apply(self, A, i, t):
        return np.matmul(self.S[:i, :t], A[:t, :])

    def generateAdvInput(self, d):
        ns = np.array(null_space(self.S))
        #extract first column of ns
        kernelVec=ns[:,0]
        A = []
        colScale = []
        for j in range(d):
            colScale.append(NUMERICAL_SCALING*random.uniform(0,1))

        for i in range(len(kernelVec)):
            rowVec = []
            for j in range(d):
                rowVec.append(kernelVec[i]*colScale[j])
            A.append(rowVec)
```

```

        return np.array(A)

def outputReg(M):
    A = M[:, :-1]
    b = M[:, -1:]
    reg = LinearRegression().fit(A, b)
    return reg

def squaredLoss(reg, M):
    features = M[:, :-1]
    b = M[:, -1:]
    preds = reg.predict(features)
    return np.sum((preds - b)**2) / len(b)

# Leveraged Sampling: Code repeated to make section self contained.

class LeverageSampler:
    def __init__(self, scale=10):
        self.first = True
        self.scale = scale

    def Sample(self, batch):
        added = 0
        for b in batch:
            recompute_iv = False

            if self.first:
                self.first = False
                self.M = b
                added += 1
                self.M = np.expand_dims(self.M, axis=0)
                recompute_iv = True
            else:
                score = np.matmul(b, np.matmul(self.MTM_IV, b.T))
                assert(score > 0)
                probAdd = min(1.0, score*self.scale)
                randomNum = random.uniform(0, 1)
                if randomNum <= probAdd:
                    added += 1
                    self.M = np.vstack([self.M, b/math.sqrt(probAdd)])
                    recompute_iv = True
            if recompute_iv:
                self.MTM_IV = np.linalg.pinv(np.matmul(self.M.T, self.M))
        return added

    def Reg(self):

```



```

        A = self.M[:, :-1]
        b = self.M[:, -1:]
        return LinearRegression().fit(A, b)

# Compare methods over data:
TOTAL_SKETCHED_SAMPLES = 50
TOTAL_DATA_SAMPLES = 2000

def simulate_sketching_lr(total_sketched_samples=100,
                        total_data_samples=1000,
                        data_dim=10,
                        batch_size=25,
                        initial_batches=1):
    S = Sketch(total_sketched_samples, total_data_samples)
    A = S.generateAdvInput(data_dim)
    smp_data = np.split(A, int(total_data_samples / batch_size))
    effective_data_samples = initial_batches * batch_size
    done = False
    sqerr_sketch = []
    sqerr_smp = []
    batch_num = 0
    smp_total = 0

    smp = LeverageSampler()

    while not done:
        if effective_data_samples >= total_data_samples:
            done = True
            effective_data_samples = total_data_samples
            effective_sketched_samples = int(effective_data_samples * (total_sketched_samples / total_data_samples))
            SA_i = S.apply(A, effective_sketched_samples, effective_data_samples)
            regSA_i = outputReg(SA_i)
            sqerr_sketch.append(squaredLoss(regSA_i, A[:effective_data_samples, :]))

            smp_batch = smp_data[batch_num]
            smp_added = smp.Sample(smp_batch)
            smp_total += smp_added
            sqerr_smp.append(squaredLoss(smp.Reg(), A[:effective_data_samples, :]))

            effective_data_samples += batch_size
            batch_num += 1
        return sqerr_sketch, sqerr_smp, smp_total

errlst_sketch, errlst_smp, smp_total = simulate_sketching_lr(
    total_sketched_samples=TOTAL_SKETCHED_SAMPLES,
    total_data_samples=TOTAL_DATA_SAMPLES,

```

```
data_dim=6,  
batch_size=10,  
initial_batches=10)
```
